# Supplementary material
Source: PubMed Central journal article supplement (PMC5839030)
Supplement: 41431_2017_61_MOESM1_ESM.pdf [file 41431_2017_61_MOESM1_ESM.pdf]

Beta defensin copy number

Log HBD3 pg /  $\mu$ g total protein

(a)

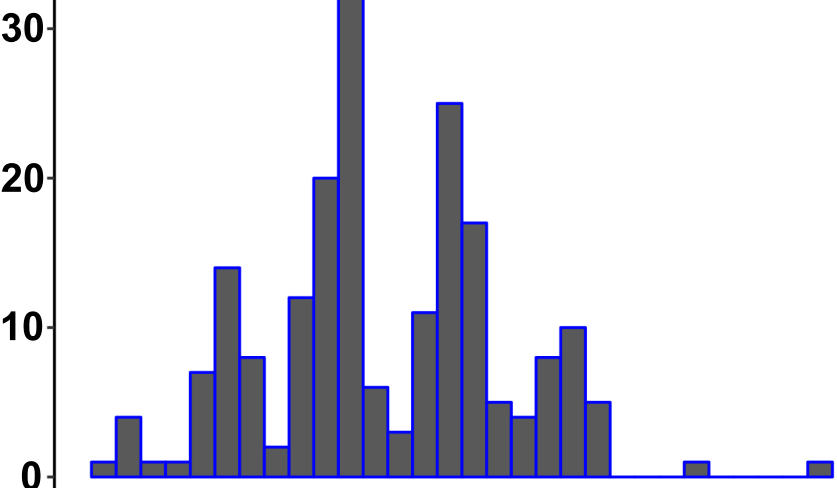

Supplementary Figure 1

(b)

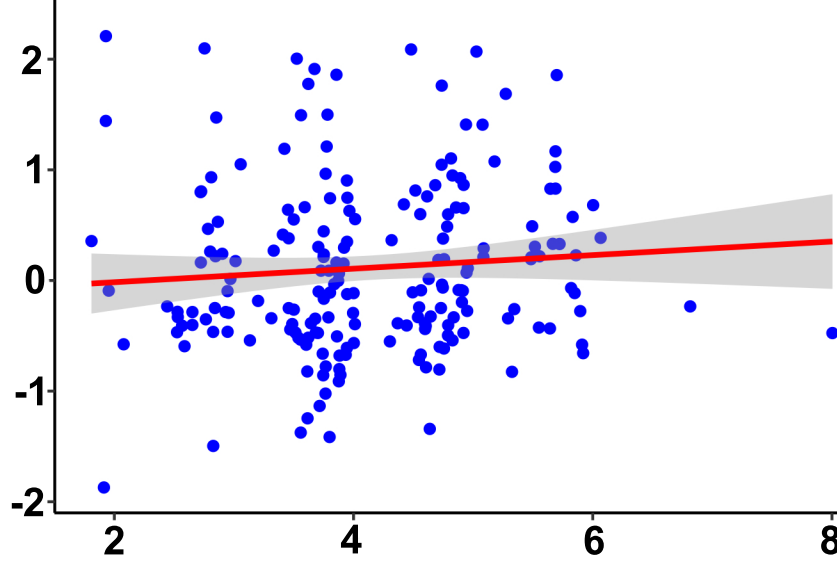

(c)

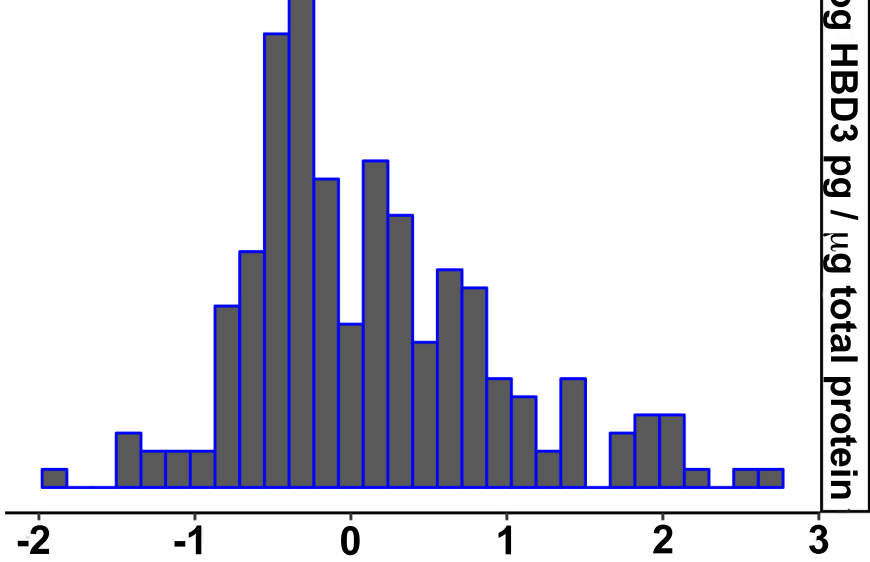

Beta defensin copy number

Log HBD3 pg /  $\mu$ g total protein
