# Supplementary material
Source: PubMed Central journal article supplement (PMC5839030)

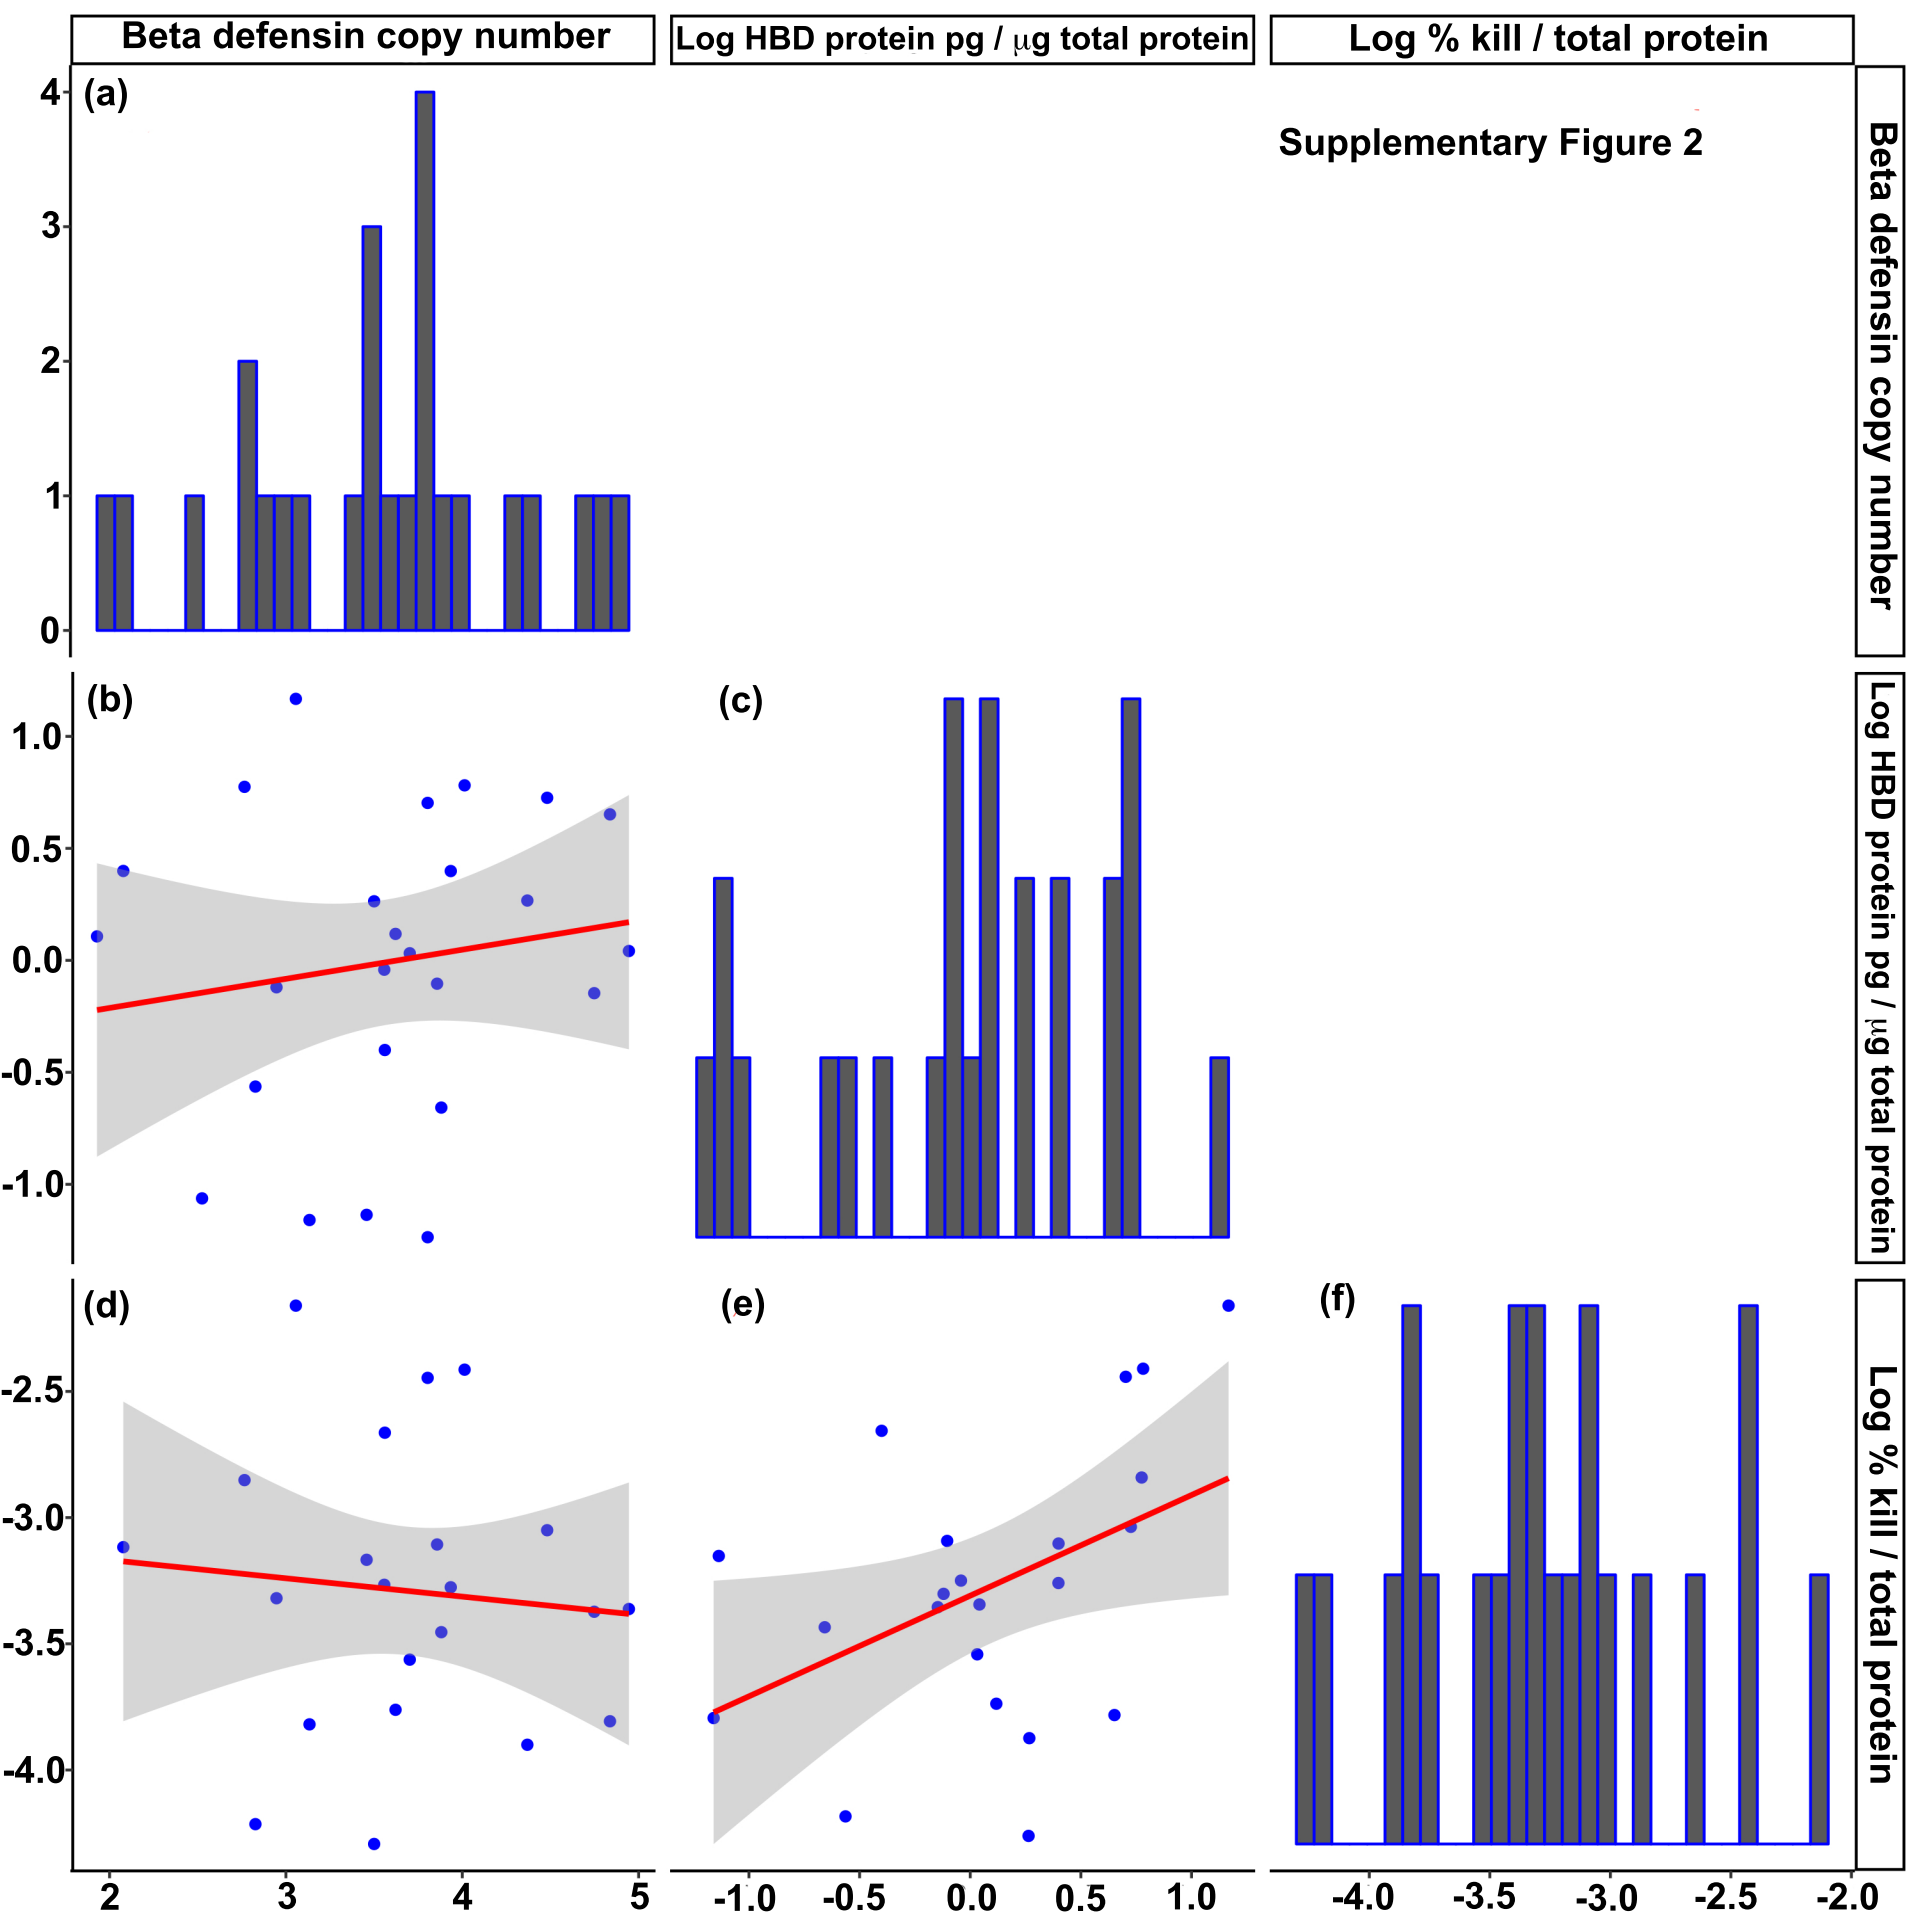

Supplement: 41431_2017_61_MOESM2_ESM.pdf [file 41431_2017_61_MOESM2_ESM.pdf]

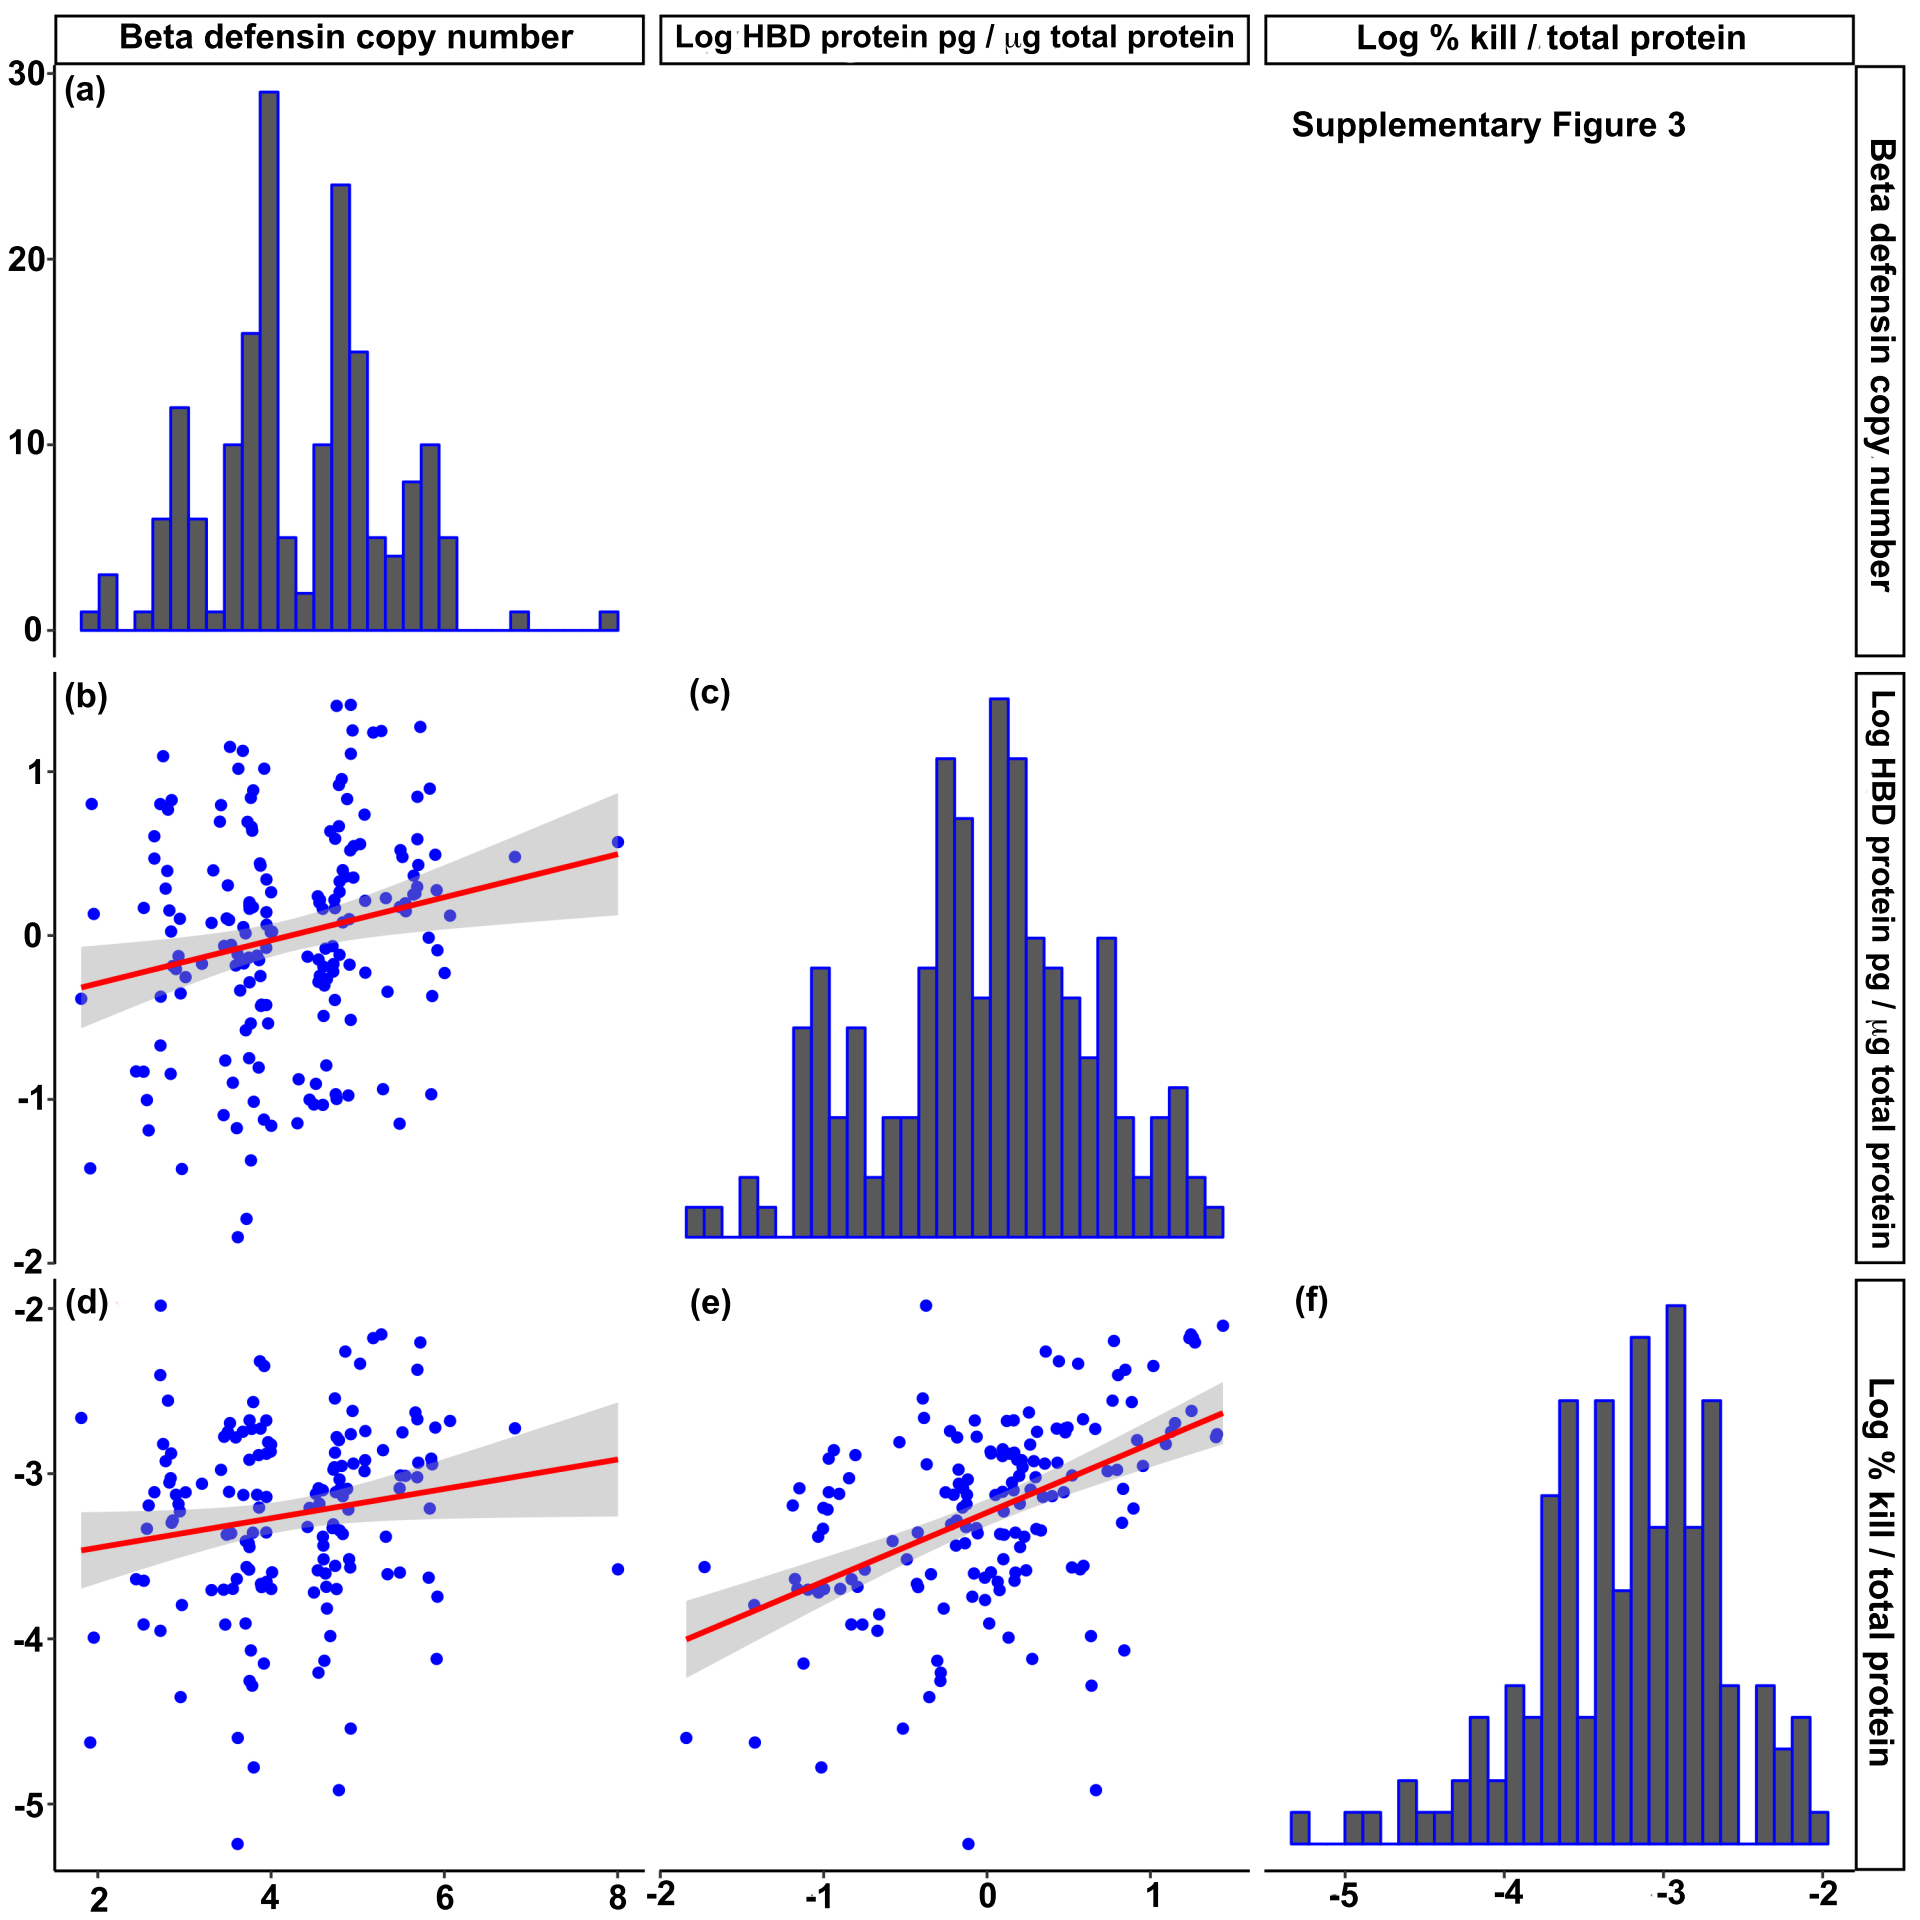

Supplement: 41431_2017_61_MOESM3_ESM.pdf [file 41431_2017_61_MOESM3_ESM.pdf]
